# Supplementary material for: The effect of a micro-crystalline ZnO with columnar structure on the crystallization behavior and mechanical properties of poly(ethylene 2,6-naphthalate)
Source: Royal Society of Chemistry journal article supplement (doi:10.1039/d1ce00629k), 2021-01-01
Supplement: d1ce00629k1.pdf [file d1ce00629k1.pdf]

## Supporting Information

The effect of a micro-crystalline ZnO with columnar structure on the crystallization behavior and mechanical properties of poly(ethylene 2,6-naphthalate)

Jianqi Yao <sup>a</sup>, Xuzhao Li<sup>\*b</sup>, Jing Lu <sup>a</sup>, Qing Ma <sup>a</sup>, Yongdong Liu <sup>a</sup>, Faliang Luo<sup>\*a</sup>

*a. State Key Laboratory of High-efficiency Coal Utilization and Green Chemical Engineering, Ningxia*

*University, Yinchuan 750021, China*

*b. People's Hospital of Ningxia Hui Autonomous Region(First Affiliated Hospital of Northwest Minzu*

*University), Yinchuan 750021, China*

*\*Corresponding Author: Faliang Luo, Email: [fluo@iccas.ac.cn](mailto:fluo@iccas.ac.cn)*

*Xuzhao Li, Email: [251170583@qq.com](mailto:251170583@qq.com)*

## XRD analysis

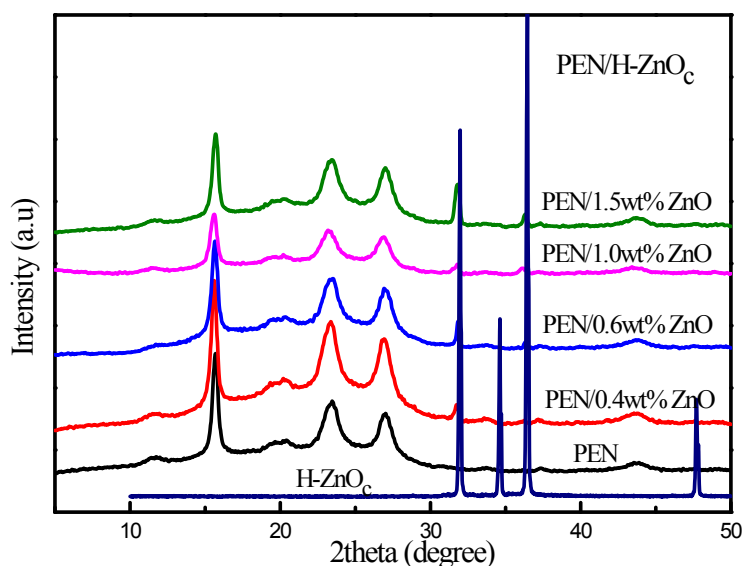

Figure 1. XRD patterns for H-ZnO<sub>c</sub>, PEN and PEN/H-ZnO<sub>c</sub> blends

Figure 1 shows the crystal phases of H-ZnO<sub>c</sub>, PEN and PEN/H-ZnO<sub>c</sub> composites.

The diffraction peaks at 16.4°, 22.7° and 25.8° are attributed to (010), (100) and (10)

crystal plane of PEN, respectively<sup>16</sup>. In Figure 1, the peak positions of the diffraction peaks of the composites has not shifted, illustrating that H-ZnO<sub>c</sub> does not change the crystal form of PEN. Two new peaks at  $2\theta=31.7^\circ$  and  $36.3^\circ$ , which match to the diffraction peak of H-ZnO<sub>c</sub>, it means that H-ZnO<sub>c</sub> will agglomerate in the PEN matrix. This experimental phenomenon will be further confirmed by the SEM cross-sectional photos of the PEN/H-ZnO<sub>c</sub> composite material.
